# Supplementary material
Source: Springer Nature journal article supplement (https://www.springermedizin.de/resource/supplementary/12887_2014_1014_MOESM1_ESM.pdf/9477002)
Supplement: MOESM1 [file 9477002]

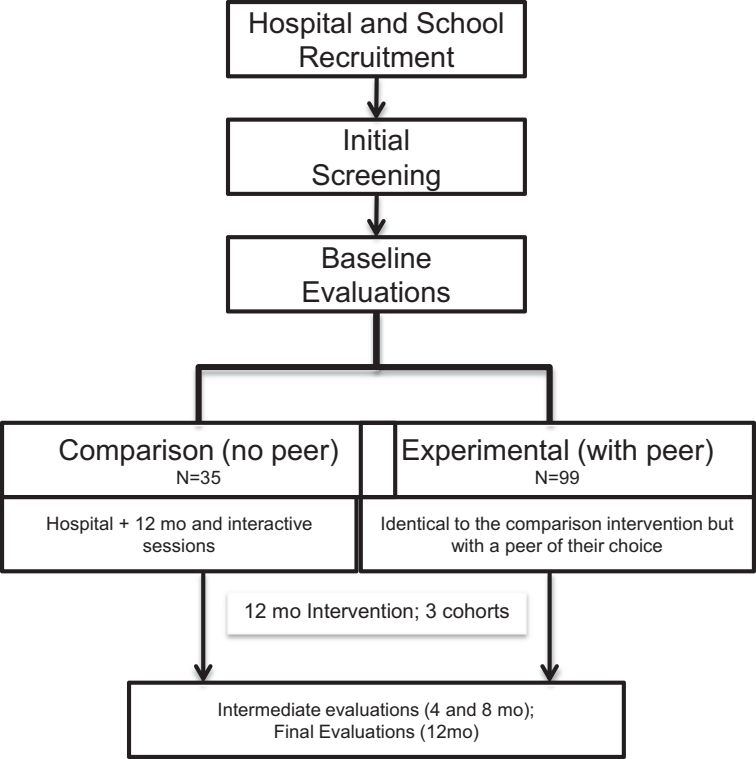

Hospital and School  
Recruitment

Initial  
Screening

Baseline  
Evaluations

Comparison (no peer)

N=35

Experimental (with peer)

N=99

Hospital + 12 mo and interactive  
sessions

Identical to the comparison intervention but  
with a peer of their choice

12 mo Intervention; 3 cohorts

Intermediate evaluations (4 and 8 mo);  
Final Evaluations (12mo)
